# Supplementary material
Source: Springer Nature journal article supplement (https://www.springermedizin.de/resource/supplementary/12889_2011_3277_MOESM1_ESM.pdf/9488698)
Supplement: MOESM1 [file 9488698]

**Enroll women from 18 clinics  
(30 children per clinic, N=540)  
Randomize clinics to intervention or control**

**Intervention (N=9 clinics, N=270 children)  
Measurement 1: Baseline**

**Implement Program**

**Measurement 2  
Evaluate effectiveness of program  
Close of formal trial period**

**No program**

**Control (N=9 clinics, N=270 children)  
Measurement 1: Baseline**

**No Program**

**Measurement 2  
Evaluate effectiveness of program  
Close of formal trial period**

**Implement Program**
